# Supplementary material for: Reflux of Endoplasmic Reticulum proteins to the cytosol inactivates tumor suppressors
Source: PubMed Central journal article supplement (PMC8724677; doi:10.15252/embr.202051412), 2021-03-12
Supplement: EMBR-22-e51412-s001.pdf [file EMBR-22-e51412-s001.pdf]

## Appendix

# Reflux of Endoplasmic Reticulum proteins to the cytosol inactivates tumor suppressors

Daria Sicari<sup>1,2,13</sup>, Federica Grazia Centonze<sup>1,2#</sup>, Raphael Pineau<sup>1,2#</sup>, Pierre-Jean Le Reste<sup>1,2,3</sup>, Luc Negróni<sup>4,5,6,7</sup>, Sophie Chat<sup>8</sup>, M. Aiman Mohtar<sup>9,10</sup>, Daniel Thomas<sup>8</sup>, Reynald Gillet<sup>8</sup>, Ted Hupp<sup>9,11</sup>, Eric Chevet<sup>1,2\*</sup> and Aeid Igbaria<sup>1,2,12\*</sup>

|                                        |            |
|----------------------------------------|------------|
| <b>Appendix tables S1 – S2</b>         | <b>2</b>   |
| <b>Appendix Figure Legends S1 – S3</b> | <b>3</b>   |
| <b>Appendix Figures S1-S3</b>          | <b>4-6</b> |

## Appendix Tables

**Appendix Table S1:** Characteristic of human patients involved in this study

| Patient | Age at diagnosis | Gender | Symptoms                | Karnofsky index | Location            | IDH status | ATRX expression |
|---------|------------------|--------|-------------------------|-----------------|---------------------|------------|-----------------|
| 1       | 72               | Male   | Aphasia                 | 80              | Left frontal lobe   | WT         | conserved       |
| 2       | 72               | Male   | Memory disturbance      | 70              | Right temporal lobe | Mutated    | conserved       |
| 3       | 65               | Female | Cognitive disturbance   | 70              | Corpus callosum     | WT         | conserved       |
| 4       | 70               | Female | Seizures                | 100             | Right frontal lobe  | Mutated    | conserved       |
| 5       | 70               | Male   | Cognitive disturbance   | 80              | Left temporal lobe  | WT         | conserved       |
| 6       | 53               | Male   | Headache                | 90              | Right temporal lobe | WT         | conserved       |
| 7       | 73               | Male   | Cognitive disturbance   | 70              | Right temporal lobe | WT         | conserved       |
| 8       | 50               | Male   | Seizures                | 90              | Right frontal lobe  | WT         | conserved       |
| 9       | 67               | Female | Seizures, motor deficit | 70              | Left frontal lobe   | WT         | conserved       |

**Appendix Table S2:** List of the identified N-glycopeptides from the HEK293T cells treated with Tg and from the cytosolic fraction of isolated human GBM tumors.

| Accession | Description                                                            | split after | baseGlyco | target | Coverage [%] | # Peptides | # PSMs | Junique Peptic | # AAs | MW [kDa] |
|-----------|------------------------------------------------------------------------|-------------|-----------|--------|--------------|------------|--------|----------------|-------|----------|
| P14625    | Endoplasmin OS=Homo sapiens OX=9606                                    | HSP90B1     | +         | +      | 54           | 44         | 1063   | 43             | 803   | 92,4     |
| Q9NYU2    | UDP-glucose:glycoprotein glucosyltransferase 1 OS=Homo sapiens OX=9606 | UGGT1       | +         | +      | 22           | 25         | 173    | 25             | 1555  | 177,1    |
| Q96HE7    | ERO1-like protein alpha OS=Homo sapiens OX=9606                        | ERO1A       | +         | +      | 41           | 15         | 104    | 14             | 468   | 54,4     |
| Q08380    | Galectin-3-binding protein OS=Homo sapiens OX=9606                     | LGALS3BP    | +         | +      | 25           | 9          | 78     | 9              | 585   | 65,3     |
| P11047    | Laminin subunit gamma-1 OS=Homo sapiens OX=9606                        | LAMC1       | +         | +      | 19           | 20         | 66     | 20             | 1609  | 177,5    |
| Q9H3G5    | Probable serine carboxypeptidase CPVL OS=Homo sapiens OX=9606          | CPVL        |           | +      | 27           | 10         | 60     | 10             | 476   | 54,1     |
| P53634    | Dipeptidyl peptidase 1 OS=Homo sapiens OX=9606                         | CTSC        | +         | +      | 21           | 6          | 59     | 6              | 463   | 51,8     |
| P13674    | Prolyl 4-hydroxylase subunit alpha-1 OS=Homo sapiens OX=9606           | P4HA1       | +         | +      | 25           | 10         | 58     | 10             | 534   | 61       |
| Q96AY3    | Peptidyl-prolyl cis-trans Isomerase FKBP10 OS=Homo sapiens OX=9606     | FKBP10      | +         | +      | 24           | 9          | 47     | 9              | 582   | 64,2     |
| Q8NBJ5    | Procollagen galactosyltransferase 1 OS=Homo sapiens OX=9606            | COLGALT1    |           | +      | 15           | 9          | 43     | 9              | 622   | 71,6     |
| Q9UHG3    | Prenylcysteine oxidase 1 OS=Homo sapiens OX=9606                       | PCYOX1      | +         | +      | 17           | 8          | 41     | 8              | 505   | 56,6     |
| P10253    | Lysosomal alpha-glucosidase OS=Homo sapiens OX=9606                    | GAA         |           | +      | 17           | 9          | 31     | 9              | 952   | 105,3    |
| Q99538    | Legumain OS=Homo sapiens OX=9606                                       | LGMN        | +         | +      | 17           | 4          | 28     | 4              | 433   | 49,4     |
| Q8NHP8    | Putative phospholipase B-like 2 OS=Homo sapiens OX=9606                | PLBD2       | +         | +      | 12           | 6          | 18     | 6              | 589   | 65,4     |
| P08236    | Beta-glucuronidase OS=Homo sapiens OX=9606                             | GUSB        |           | +      | 8            | 4          | 12     | 4              | 651   | 74,7     |
| Q12841    | Follistatin-related protein 1 OS=Homo sapiens OX=9606                  | FSTL1       |           | +      | 13           | 4          | 10     | 4              | 308   | 35       |
| P07711    | Cathepsin L1 OS=Homo sapiens OX=9606                                   | CTSL        |           | +      | 8            | 2          | 7      | 2              | 333   | 37,5     |
| Q9H497    | Torsin-3A OS=Homo sapiens OX=9606                                      | TOR3A       | +         | +      | 7            | 2          | 5      | 2              | 397   | 46,2     |

## Appendix Figure Legends

### Appendix Figure S1. ER protein reflux in human and mouse derived GBM tumors.

(A) schematic of the subcellular protein fractionation experiment flow. (B) Western blot for the UPR markers in total cell lysates from mice-derived tumor (T) and non-tumor tissues (NT). (C) Flow chart representation of the differential centrifugation protocol used in this study to obtain the cytosolic fraction. (D) Western blot experiments of ER-luminal proteins of GL261-grafted-mice-derived tumor masses using differential centrifugation protocol. (E) Western blot experiments of ER-luminal proteins of U87-grafted-mice-derived tumor masses (n=4). Tissues were isolated as described in material and methods and subjected to subcellular protein fractionation (digitonin permeabilization). Lower panel show percentage of proteins (DNAJB11, PDIA9 and PDIA3) detected in the cytosolic fraction. The horizontal line represent the sample mean. (F) Schematic of our workflow for GBM Human-patient derived tumors. (G-H) ENDOH deglycosylation assay of DNAJB11 from the cytosolic fraction isolated from murine-derived GBM tumors (G) or human derived GBM tumors (H).

### Appendix Figure S2: The integrity of the ER membrane is not affected during ER stress

(A) Intensity plots along the lines drawn in the confocal images in Fig.2A showing the co-localization of ER-targeted sfGFP and the cytosolically localized mCherry in these regions. Fluorescence intensity plots were generated using the software Leica LAS AF lite. (B) top: Schematic representation of the ER-targeted yemEos3.2 construct and principles of function. Bottom: representative images of cells transfected with ER targeted mEOS3.2 after a UV pulse. UV light was used to first convert the mEos3.2 then images were taken at 550 nm in the absence or presence of Tm and BFA. Scale bar 15 $\mu$ m (C-D) Proteinase-K protection assay on pellets obtained post digitonin fraction (C) or on the pellet after the 100K RCF centrifugation. (E) Redox state of membrane bound eroGFP on non-reducing gel vs. reducing after alkylating with N-Ethylmaleimide. (F) Proteomics experiments workflow. Right panel show Volcano plot before and after N-Glyco protein enrichment.

### Appendix Figure S3: ER protein reflux in cancer cells.

(A-C) Subcellular protein fractionation of several ER resident proteins in A549 cells treated with 100ng/mL Tunicamycin (Tm), 25nM Thapsigargin (Tg) or 0.25nM Brefeldin-A (BFA) for different time points using Digitonin. (D-F) Quantification of the subcellular protein fractionation of several ER endogenous proteins in A549 cells as in A-C respectively. Bars indicate the treatment in terms of hours. Biological triplicates, mean  $\pm$  SD calculated using Prism 9 (GraphPad). (G) Graph show the percentage of ER-luminal proteins in the cytosol of non-cancer (MRC5, MEF and HEK293T) and cancer cells (A549, MCF7 and GL-261) in non-stressed conditions. (H-I) Sulforhodamine-B (SRB) assay in A549 cells treated with different concentrations of Tm (100 and 250ng/mL), Tg (10, 25 and 100nM) and BFA (0.1 and 0.25nM) for 24 hours (H) or 48 hours (I) in the presence and absence of etoposide. Biological triplicates, mean  $\pm$  SD calculated using Prism 9 (GraphPad).

# Appendix Figures

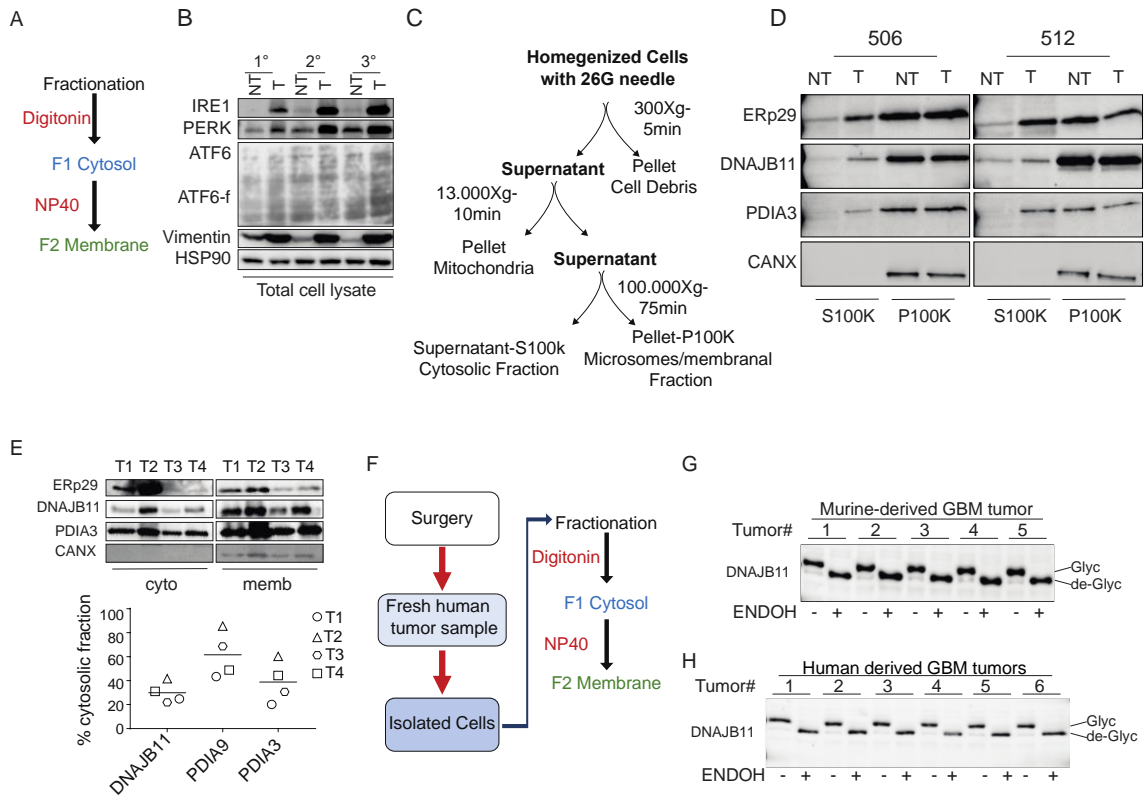

Sicari et al, Appendix Figure S1

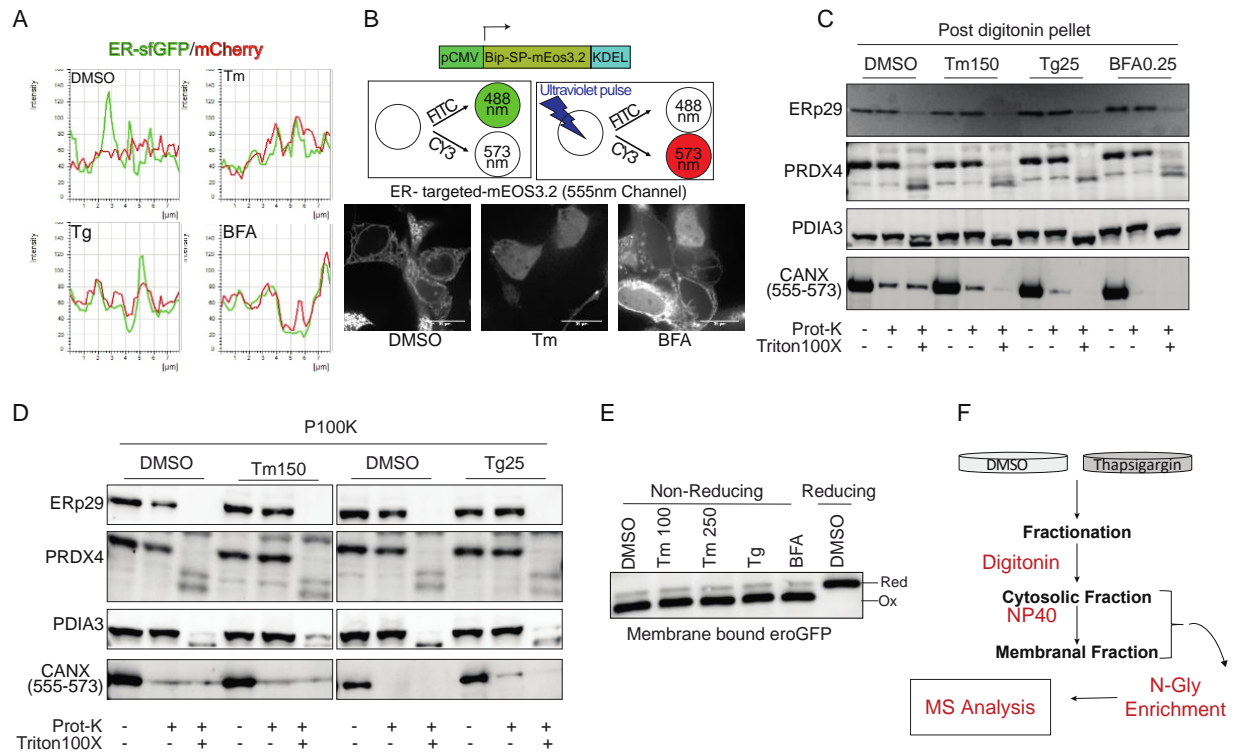

Sicari et al, Appendix Figure S2

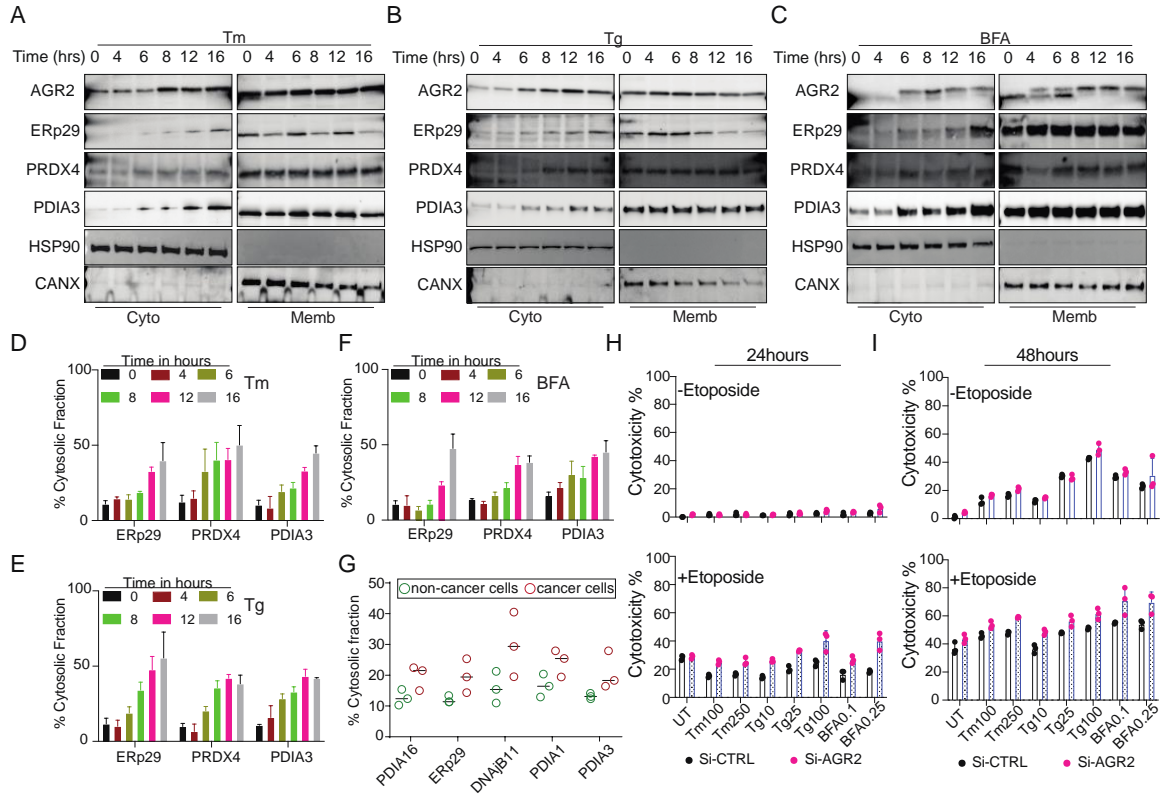

Sicari et al, Appendix Figure S3
